# Supplementary material
Source: PubMed Central journal article supplement (PMC3069761)
Supplement: JCI42894sd.pdf [file JCI42894sd.pdf]

**Supplemental Information**, Sos, Harris et al., Profound Fatty Liver in Mice with Hepatocyte-Specific Deletion of JAK2 is Completely Rescued by Abrogation of Growth Hormone Secretion

**Supplemental Figure S1**

Representative Images of 20 Week Old JAK2L Mouse Livers.

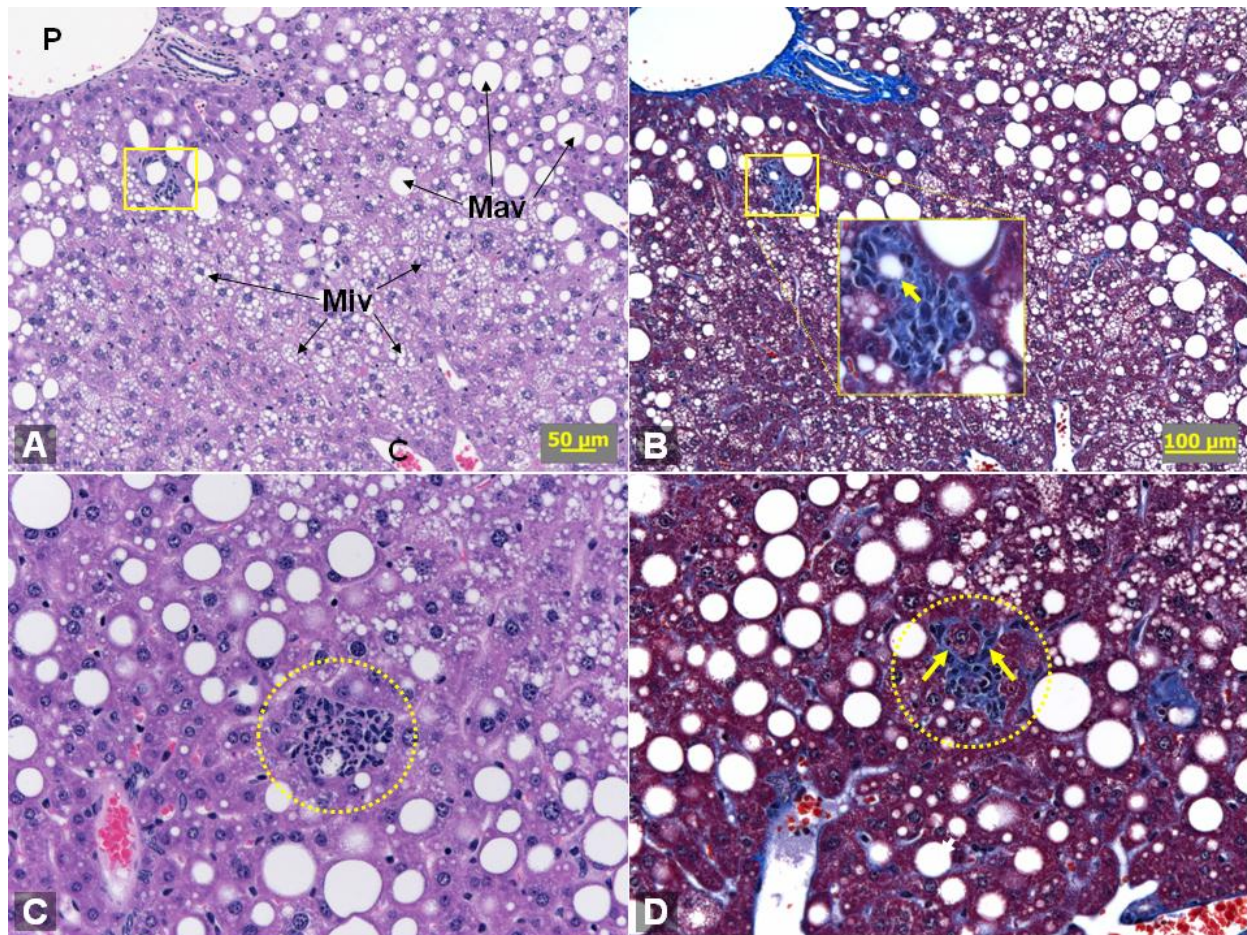

**A** – H+E. There is diffuse hepatocellular lipodosis affecting the entire lobule, i.e. from centrilobular (roughly corresponding to zone 3) to portal (roughly corresponding to zone 1). In contrast to typical lipid distribution in NASH (predominantly macrovesicular and zone 3), microvesicular and macrovesicular change coexist, with macrovesicular change most evident midlobular (roughly corresponding to zone 2). Small foci of inflammation occur at random within lobules (yellow square). P=portal vein. C=central vein. Miv=microvesicular change with vesicle  $\emptyset$  < hepatocellular nuclei. Mav=macrovesicular change. **B** – Trichrome. Same lobule as shown in A. Within the focus of inflammation there is deposition of sparse collagenous matrix (royal blue). Arrow: free lipid droplets are occasionally enclosed within the foci. **C** – H+E. Small intralobular focus of inflammation. **D** – Trichrome. Same focus as in C. Spindle cells and

sparse collagenous matrix extend from the focus to enclose and isolate an adjacent hepatocyte (arrows). This type of “perisinuoidal” fibrosis is typical for NASH.

## Supplemental Table S1

### Basic Metabolic Parameters in JAK2L and Con Mice

|                                                | Con (n = 4-6)  | JAK2L (n = 4-6)            |
|------------------------------------------------|----------------|----------------------------|
| <i>Total Protein g/dL</i>                      | 5.6 ± 0.12     | 5.33 ± 0.7                 |
| <i>Albumin g/dL</i>                            | 3.63 ± 0.03    | 3.73 ± 0.03                |
| <i>Glucose mg/dL</i>                           | 199 ± 1.53     | 199.67 ± 2.03              |
| <i>Total Bilirubin mg/dL</i>                   | 0.2 ± 0        | 0.2 ± 0                    |
| <i>Alkaline Phosphatase U/L</i>                | 116.67 ± 4.98  | 186.67 ± 7.22 <sup>a</sup> |
| <i>Aspartate Transaminase (AST) U/L</i>        | 60.33 ± 1.45   | 101.67 ± 4.41 <sup>b</sup> |
| <i>Alanine Transaminase (ALT) U/L</i>          | 31.33 ± 1.86   | 101.33 ± 2.03 <sup>c</sup> |
| <i>Blood Urea Nitrogen (BUN) mg/dL</i>         | 27.5 ± 1.56    | 33 ± 1.50                  |
| <i>Creatinine mg/dL</i>                        | 0.2 ± 0        | 0.2 ± 0                    |
| <i>Gamma glutamyl transpeptidase (GGT) U/L</i> | 1.33 ± 0       | 1.33 ± 0.33                |
| <i>Total Cholesterol mg/dl</i>                 | 155 ± 21       | 166.25 ± 10.70             |
| <i>Triglyceride mg/dl</i>                      | 136.33 ± 40.40 | 146.36 ± 20.66             |
| <i>High Density Lipoprotein (HDL) mg/dl</i>    | 105.33 ± 21.18 | 127.05 ± 7.39              |
| <i>Free Fatty Acids (FFA)mmol/L</i>            | 0.789 ± 0.07   | 1.28 ± 0.11 <sup>a</sup>   |
| <i>Leptin ng/ml</i>                            | 8.30 ± 1.91    | 19.87 ± 2.53 <sup>a</sup>  |
| <i>Insulin ng/ml</i>                           | 0.76 ± 0.10    | 0.86 ± 0.11                |

<sup>a</sup>  $p < 0.01$ ; <sup>b</sup>  $p < 0.001$ ; <sup>c</sup>  $p < 0.0001$

## Supplemental Figure S2

Glucose and Insulin Tolerance Tests.

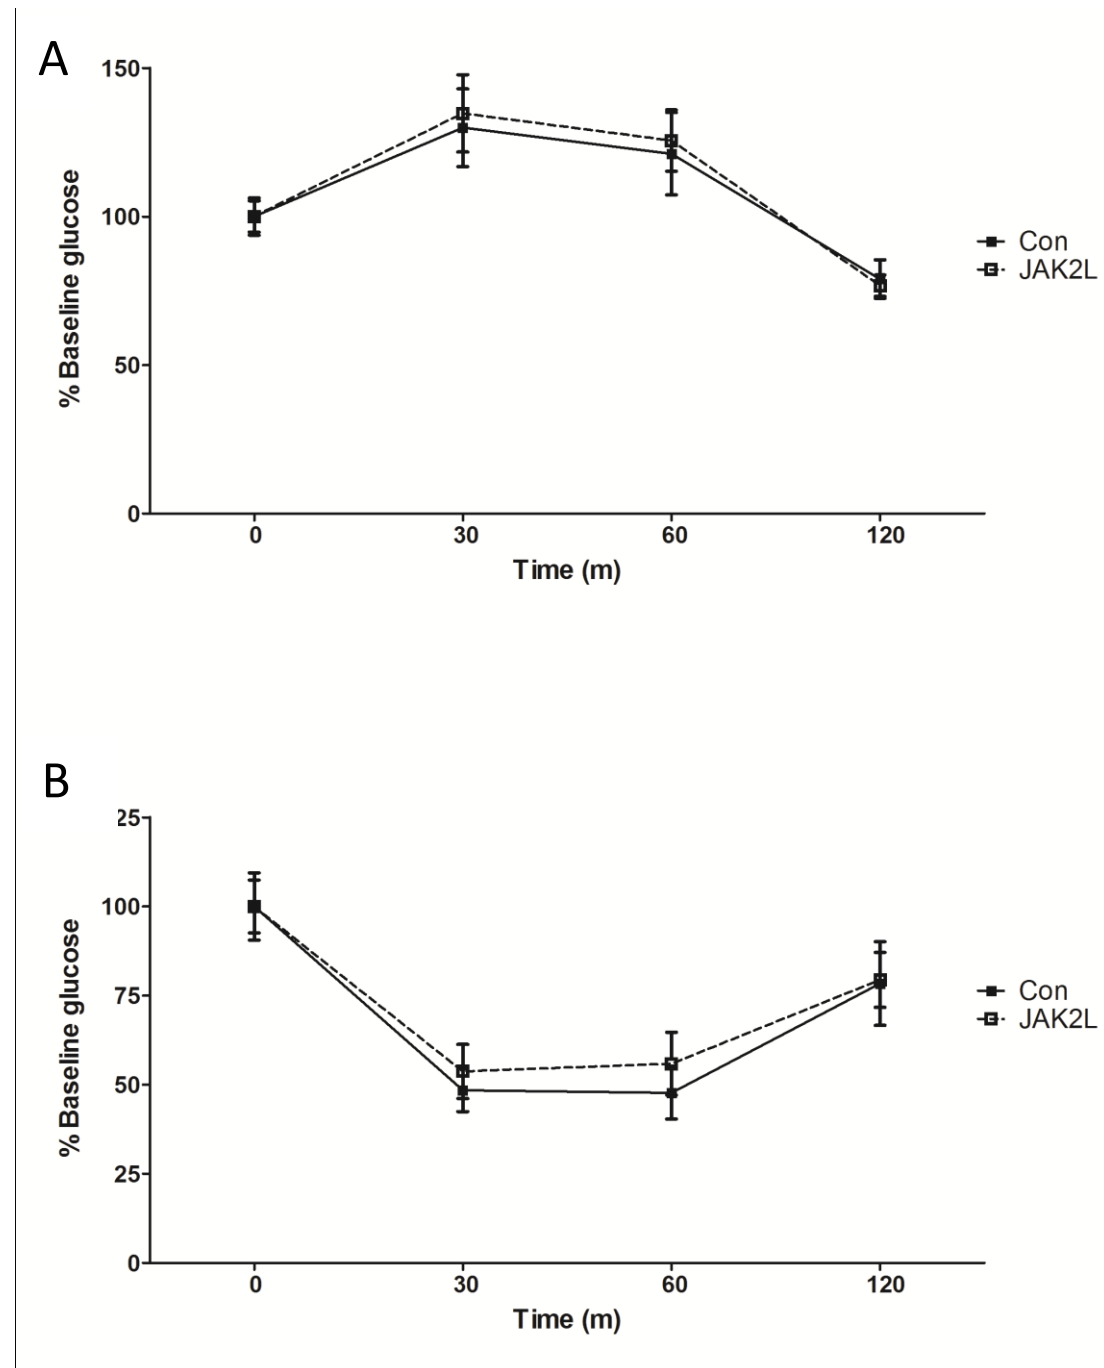

There were no differences in glucose **(a)** or insulin **(b)** tolerance in 8-week-old JAK2L mice versus Con.

### Supplemental Figure S3

Liver Triglyceride Content in Younger JAK2L Mice.

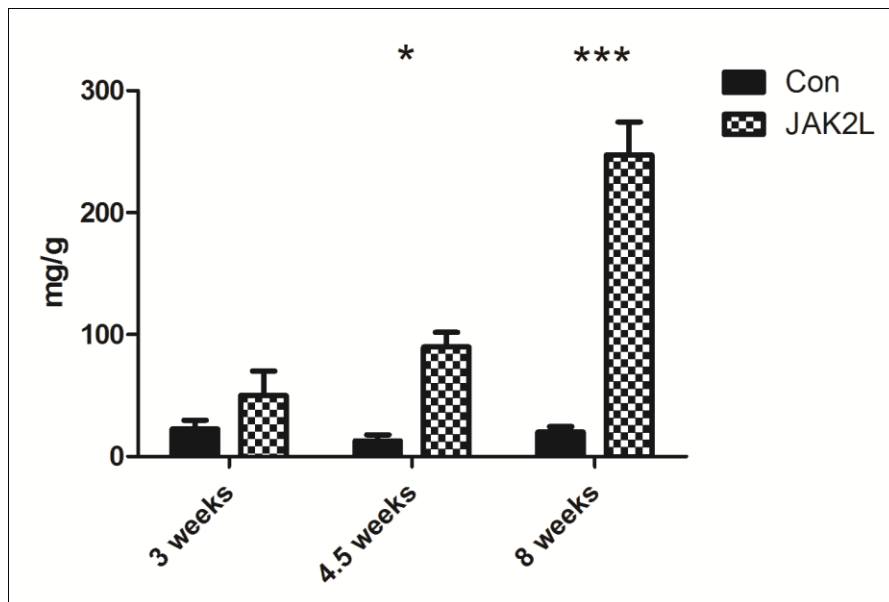

Liver TG of JAK2L and Con mice content was measured using the colorimetric assay at 3, 4.5 and 8 weeks of age ( $n = 5$  for each group). Values are expressed as mean  $\pm$  SEM. \* $P < 0.05$ , \*\*\* $P < 0.001$ .

### Supplemental Figure S4

Liver Fatty Acid Content.

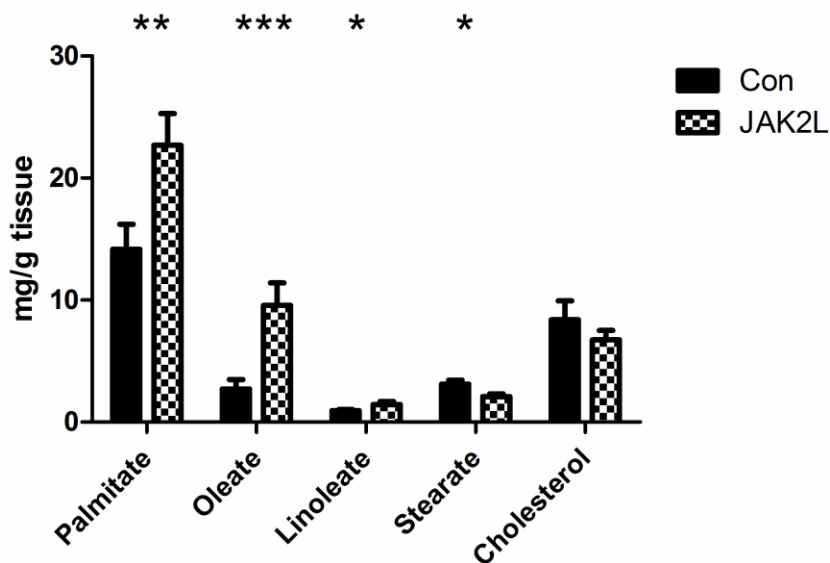

The content of each indicated lipid was measured in 4-week-old male Con ( $n=9$ ) and JAK2L ( $n=6$ ) mice. Values are expressed as mean  $\pm$  SEM. \* $P < 0.05$ , \*\* $P < 0.01$ , \*\*\* $P < 0.001$ .

## Supplemental Figure S5

Triglyceride Secretion.

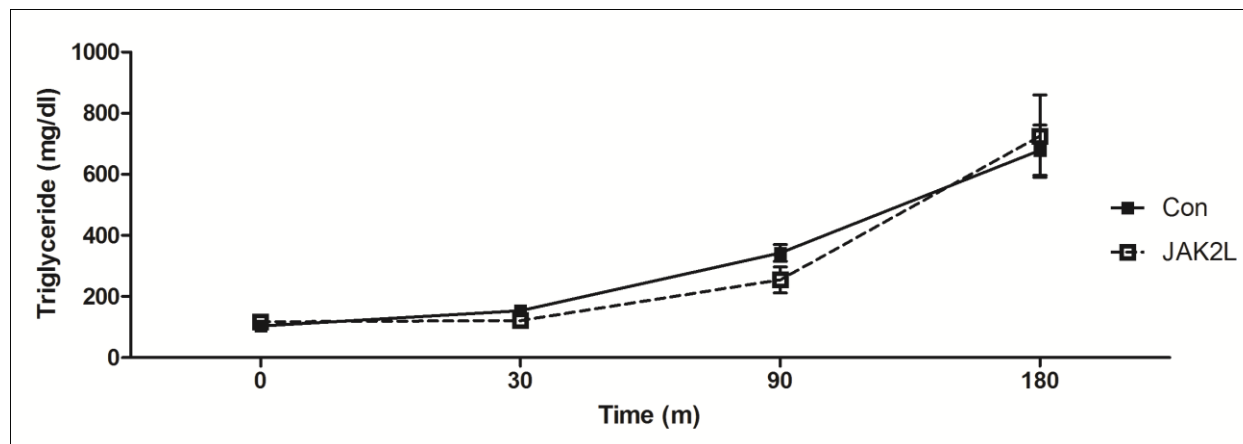

There were no differences in TG secretion rates after injection with Triton WR-1339.

## Supplemental Table S2

### Liver Expression of Genes Related to Lipid Metabolism

| MGI Name                                                         | MGI Name Full                                                                                   | Male JAK2L:Con |      |                | Female JAK2L:Con |      |                |
|------------------------------------------------------------------|-------------------------------------------------------------------------------------------------|----------------|------|----------------|------------------|------|----------------|
|                                                                  |                                                                                                 | Fold Change    | SEM  | P-Value        | Fold Change      | SEM  | P-Value        |
| <b><u>Peroxisome Proliferator Activated Receptor Related</u></b> |                                                                                                 |                |      |                |                  |      |                |
| Ppara                                                            | peroxisome proliferator activated receptor alpha                                                | 1.29           | 0.06 | <b>0.00450</b> | 1.24             | 0.10 | <b>0.04774</b> |
| Ppard                                                            | peroxisome proliferator activator receptor delta                                                | 1.01           | 0.08 | 0.92385        | 1.07             | 0.06 | 0.31174        |
| Pparg                                                            | peroxisome proliferator activated receptor gamma                                                | 2.95           | 0.84 | <b>0.00363</b> | 2.47             | 0.34 | <b>0.00347</b> |
| Ppargc1a                                                         | peroxisome proliferative activated receptor, gamma, coactivator 1 alpha                         | 1.42           | 0.20 | <b>0.03932</b> | 1.58             | 0.21 | <b>0.01726</b> |
| Ppargc1b                                                         | peroxisome proliferative activated receptor, gamma, coactivator 1 beta                          | 1.06           | 0.06 | 0.33986        | 1.19             | 0.08 | 0.06864        |
| <b><u>Lipid Metabolism Related</u></b>                           |                                                                                                 |                |      |                |                  |      |                |
| Acaca                                                            | acetyl-Coenzyme A carboxylase alpha                                                             | 2.47           | 0.68 | <b>0.00692</b> | 0.81             | 0.27 | 0.53245        |
| Acacb                                                            | acetyl-Coenzyme A carboxylase beta                                                              | 1.21           | 0.57 | 0.67643        | 0.25             | 0.09 | 0.09487        |
| Acly                                                             | ATP citrate lyase                                                                               | 1.54           | 0.57 | 0.22308        | 0.46             | 0.13 | 0.08967        |
| Fasn                                                             | fatty acid synthase                                                                             | 2.86           | 1.58 | <b>0.02808</b> | 0.86             | 0.35 | 0.71551        |
| Insig1                                                           | insulin induced gene 1                                                                          | 1.03           | 0.29 | 0.92557        | 0.84             | 0.15 | 0.39821        |
| Insig2                                                           | insulin induced gene 2                                                                          | 1.58           | 0.24 | <b>0.02414</b> | 1.55             | 0.26 | <b>0.04697</b> |
| Scd1                                                             | stearoyl-Coenzyme A desaturase 1                                                                | 2.25           | 1.02 | 0.05064        | 0.94             | 0.20 | 0.77399        |
| Scd2                                                             | stearoyl-Coenzyme A desaturase 2                                                                | 10.99          | 4.09 | 0.05590        | 3.96             | 0.50 | <b>0.00318</b> |
| Scd4                                                             | stearoyl-Coenzyme A desaturase 4                                                                | 1.26           | 0.09 | <b>0.04018</b> | 1.11             | 0.06 | 0.11260        |
| Agpat1                                                           | 1-acylglycerol-3-phosphate O-acyltransferase 1 (lysophosphatidic acid acyltransferase, alpha)   | 1.04           | 0.09 | 0.67748        | 1.16             | 0.09 | 0.14703        |
| Agpat2                                                           | 1-acylglycerol-3-phosphate O-acyltransferase 2 (lysophosphatidic acid acyltransferase, beta)    | 1.50           | 0.14 | <b>0.01135</b> | 1.67             | 0.31 | <b>0.02449</b> |
| Agpat3                                                           | 1-acylglycerol-3-phosphate O-acyltransferase 3                                                  | 1.26           | 0.03 | <b>0.00069</b> | 1.28             | 0.06 | <b>0.00815</b> |
| Agpat4                                                           | 1-acylglycerol-3-phosphate O-acyltransferase 4 (lysophosphatidic acid acyltransferase, delta)   | 1.06           | 0.05 | 0.29438        | 0.88             | 0.09 | 0.26311        |
| Agpat5                                                           | 1-acylglycerol-3-phosphate O-acyltransferase 5 (lysophosphatidic acid acyltransferase, epsilon) | 1.17           | 0.06 | <b>0.03478</b> | 1.18             | 0.07 | 0.06007        |
| Agpat6                                                           | 1-acylglycerol-3-phosphate O-acyltransferase 6 (lysophosphatidic acid acyltransferase, zeta)    | 0.82           | 0.03 | <b>0.00849</b> | 1.08             | 0.03 | <b>0.03854</b> |
| Agpat9                                                           | 1-acylglycerol-3-phosphate O-acyltransferase 9                                                  | 1.48           | 0.12 | <b>0.01489</b> | 1.40             | 0.18 | <b>0.04225</b> |
| Dgat1                                                            | diacylglycerol O-acyltransferase 1                                                              | 1.13           | 0.08 | 0.19599        | 1.36             | 0.13 | <b>0.03022</b> |
| Dgat2                                                            | diacylglycerol O-acyltransferase 2                                                              | 1.30           | 0.09 | <b>0.01789</b> | 1.20             | 0.14 | 0.22365        |
| Dgat2l3                                                          | diacylglycerol O-acyltransferase 2-like 3                                                       | 1.06           | 0.06 | 0.41006        | 1.08             | 0.04 | 0.11499        |

|                                       |                                                                                   |       |      |                |      |      |                |
|---------------------------------------|-----------------------------------------------------------------------------------|-------|------|----------------|------|------|----------------|
| Dgat2l4                               | diacylglycerol O-acyltransferase 2-like 4                                         | 0.95  | 0.06 | 0.41574        | 1.02 | 0.05 | 0.65053        |
| Dgat2l6                               | diacylglycerol O-acyltransferase 2-like 6                                         | 1.09  | 0.06 | 0.16311        | 0.99 | 0.12 | 0.94058        |
| Gpam                                  | glycerol-3-phosphate acyltransferase, mitochondrial                               | 2.31  | 0.79 | <b>0.02047</b> | 1.24 | 0.26 | 0.34902        |
| Mogat1                                | monoacylglycerol O-acyltransferase 1                                              | 7.63  | 1.74 | <b>0.01515</b> | 4.58 | 1.64 | 0.09352        |
| Mogat2                                | monoacylglycerol O-acyltransferase 2                                              | 0.86  | 0.08 | 0.15933        | 0.87 | 0.17 | 0.51045        |
| <b><u>Lipid Oxidation Related</u></b> |                                                                                   |       |      |                |      |      |                |
| Acaa1a                                | acetyl-Coenzyme A acyltransferase 1A                                              | 1.65  | 0.15 | <b>0.00458</b> | 1.56 | 0.14 | <b>0.00423</b> |
| Acaa1b                                | acetyl-Coenzyme A acyltransferase 1B                                              | 2.40  | 0.35 | <b>0.00102</b> | 1.90 | 0.26 | <b>0.01093</b> |
| Acaa2                                 | acetyl-Coenzyme A acyltransferase 2 (mitochondrial 3-oxoacyl-Coenzyme A thiolase) | 1.16  | 0.04 | <b>0.00683</b> | 1.21 | 0.09 | 0.06057        |
| Acox1                                 | acyl-Coenzyme A oxidase 1, palmitoyl                                              | 1.53  | 0.10 | <b>0.00110</b> | 1.56 | 0.13 | <b>0.00551</b> |
| Acox2                                 | acyl-Coenzyme A oxidase 2, branched chain                                         | 1.16  | 0.04 | <b>0.01404</b> | 1.68 | 0.21 | <b>0.01215</b> |
| Acox3                                 | acyl-Coenzyme A oxidase 3, pristanoyl                                             | 0.85  | 0.08 | 0.16287        | 0.88 | 0.03 | <b>0.03240</b> |
| Acox1                                 | acyl-Coenzyme A oxidase-like                                                      | 1.09  | 0.06 | 0.14479        | 0.99 | 0.07 | 0.90385        |
| Cpt1a                                 | carnitine palmitoyltransferase 1a, liver                                          | 1.29  | 0.07 | <b>0.00597</b> | 1.27 | 0.13 | 0.09155        |
| Cpt1b                                 | carnitine palmitoyltransferase 1b, muscle                                         | 1.39  | 0.07 | <b>0.00483</b> | 1.73 | 0.18 | <b>0.00671</b> |
| Cpt1c                                 | carnitine palmitoyltransferase 1c                                                 | 1.05  | 0.05 | 0.38268        | 0.95 | 0.11 | 0.70005        |
| Cpt2                                  | carnitine palmitoyltransferase 2                                                  | 1.26  | 0.08 | <b>0.01621</b> | 1.60 | 0.10 | <b>0.00273</b> |
| Ehhadh                                | enoyl-Coenzyme A, hydratase/3-hydroxyacyl Coenzyme A dehydrogenase                | 2.91  | 0.35 | <b>0.00011</b> | 1.74 | 0.36 | 0.08910        |
| <b><u>Lipid Transport Related</u></b> |                                                                                   |       |      |                |      |      |                |
| Cd36                                  | CD36 antigen                                                                      | 16.83 | 3.78 | <b>0.00004</b> | 6.49 | 1.00 | <b>0.00125</b> |
| Slc27a1                               | solute carrier family 27 (fatty acid transporter), member 1                       | 1.01  | 0.06 | 0.87355        | 1.02 | 0.03 | 0.64989        |
| Slc27a2                               | solute carrier family 27 (fatty acid transporter), member 2                       | 1.21  | 0.04 | <b>0.00575</b> | 1.41 | 0.20 | 0.07626        |
| Slc27a3                               | solute carrier family 27 (fatty acid transporter), member 3                       | 1.04  | 0.06 | 0.56106        | 0.90 | 0.05 | 0.14043        |
| Slc27a4                               | solute carrier family 27 (fatty acid transporter), member 4                       | 1.08  | 0.01 | <b>0.00193</b> | 1.11 | 0.04 | 0.06044        |
| Slc27a5                               | solute carrier family 27 (fatty acid transporter), member 5                       | 1.05  | 0.07 | 0.56940        | 1.06 | 0.10 | 0.56584        |
| Slc27a6                               | solute carrier family 27 (fatty acid transporter), member 6                       | 0.85  | 0.05 | 0.08302        | 0.98 | 0.09 | 0.82817        |

## Supplemental Figure S6

### CD36 Protein Content in Heart

(a) Western blots of heart tissue from JAK2L and Con mice. In the upper panel, individual mouse samples were incubated with a commercially available polyclonal antibody against CD36. In the bottom panels, the blots were stripped and incubated with an antibody against actin. There is no difference in the content of CD36 in the JAK2L samples versus Con. (b) Quantified density (Intensity\*mm<sup>2</sup>) of the CD36 band from the blot in (a).

# A

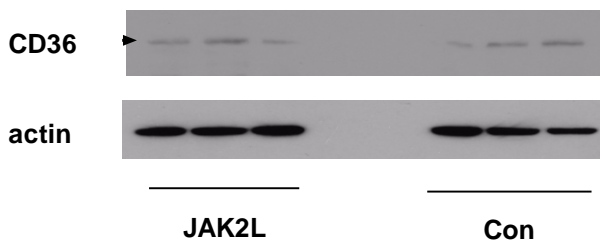

# B

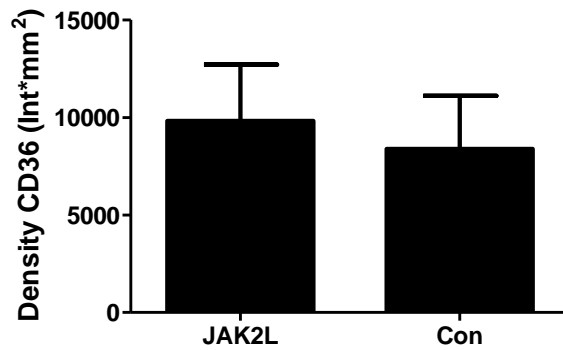



## Supplemental Table S3

### Taqman® Primer and Probe Sequences

| <b>MGI Name</b>      | <b>MGI Name Full</b>                                            | <b>Probe</b>  | <b>Sequence</b>                                            |
|----------------------|-----------------------------------------------------------------|---------------|------------------------------------------------------------|
| <b><i>Cd36</i></b>   | CD36 antigen                                                    | Forward       | CCTGGGAGTTGGCGAGAAA                                        |
|                      |                                                                 | Reverse       | CGATCACAGCCCATTCTCCT                                       |
|                      |                                                                 | Probe         | CCAGTGCTCTCCCTTGATTCTGCTGC                                 |
| <b><i>Pparg</i></b>  | peroxisome proliferator activated receptor gamma                | Forward       | CCCCTGCTCCAGGAGATCTAC                                      |
|                      |                                                                 | Reverse Probe | GCAATCAATAGAAGGAACACGTTGT<br>ACTTGTATTAGCAGGAAAGTCCCACCCGC |
| <b><i>Jak2</i></b>   | Janus kinase 2                                                  | Forward       | ATGGCCTGCCTTACAATGACAG                                     |
|                      |                                                                 | Reverse       | ATTAGCACTTCCAGGAATATCACCA                                  |
|                      |                                                                 | Probe         | AGGCAACCTCCACATCTCCTGTACATCAGA                             |
| <b><i>Igf1</i></b>   | insulin-like growth factor 1                                    | Forward       | TCGGCCTCATAGTACCCACTCT                                     |
|                      |                                                                 | Reverse       | TTATTGCAGGTGCGGTCATTT                                      |
|                      |                                                                 | Probe         | CTGCTGTGTAAACGACCCGGACCTACC                                |
| <b><i>Igf1r</i></b>  | insulin-like growth factor 1 receptor                           | Forward       | GCGATTTAGAGAAACGAACATTCC                                   |
|                      |                                                                 | Reverse Probe | CAAGTCCAAATATGGTCCATGCT<br>CACCTTGGTAACCGGCATCGTGA         |
| <b><i>Igfals</i></b> | insulin-like growth factor binding protein, acid labile subunit | Forward       | GACAATCAGATCCATGAGGTCAAG                                   |
|                      |                                                                 | Reverse Probe | AGTTGCCGGAGAGATTCATAACA<br>CGCCTTCTTTGGCCTCTTCAACGTG       |
| <b><i>Igfbp3</i></b> | insulin-like growth factor binding protein 3                    | Forward       | GCTGGTGTGTGGACAAGTATGG                                     |
|                      |                                                                 | Reverse Probe | GGCAATGTACGTCGTCTTTCC<br>AGCCCTTGCCAGGCTACGACACC           |
| <b><i>Gh</i></b>     | growth hormone                                                  | Forward       | GCTGCTCTCCTGCTTCAAGAA                                      |
|                      |                                                                 | Reverse       | AGCGGCGACACTTCATGAC                                        |
|                      |                                                                 | Probe         | ACCTGCACAAAGCGGAGACCTACCTG                                 |
| <b><i>Ghrh</i></b>   | growth hormone releasing hormone                                | Forward       | TCAGGATGCAGCGACACGTA                                       |
|                      |                                                                 | Reverse Probe | GATCACTTTCCGGGCATACAG<br>ATGCCATCTTCACCACCAACTACAGGAAAC    |
| <b><i>Ghrhr</i></b>  | growth hormone releasing hormone receptor                       | Forward       | CACTGCCCCAGGAACTACATC                                      |
|                      |                                                                 | Reverse Probe | AGAACACAGCACTGGCCTTGA<br>ACACGCAGCTGTTTGCCACCTTCA          |
